# Supplementary material for: Impact of COVID-19 on College Students’ at One of the Most Diverse Campuses in the United States: A Factor Analysis of Survey Data
Source: bioRxiv or medRxiv preprint supplement (doi:10.1101/2022.06.14.22276416), 2022-06-16
Supplement: Supplementary file [file media-2.pdf]

### Scree Plot

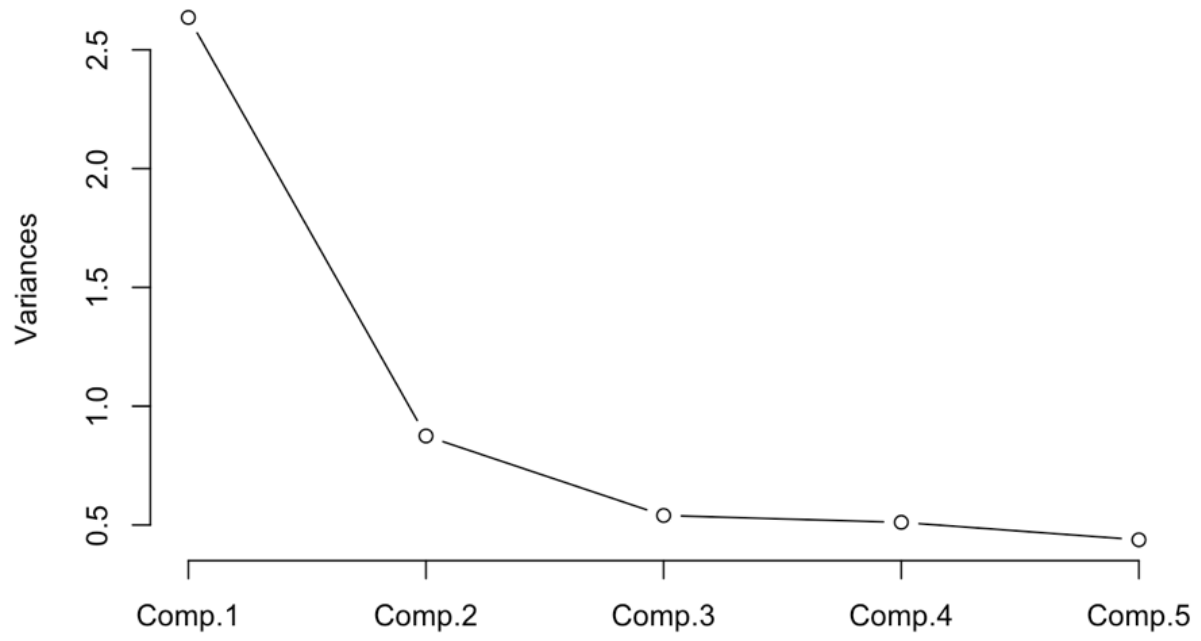

**Supplementary Figure 1:** Scree Plot for Factor Analysis with PSS-10 Scale

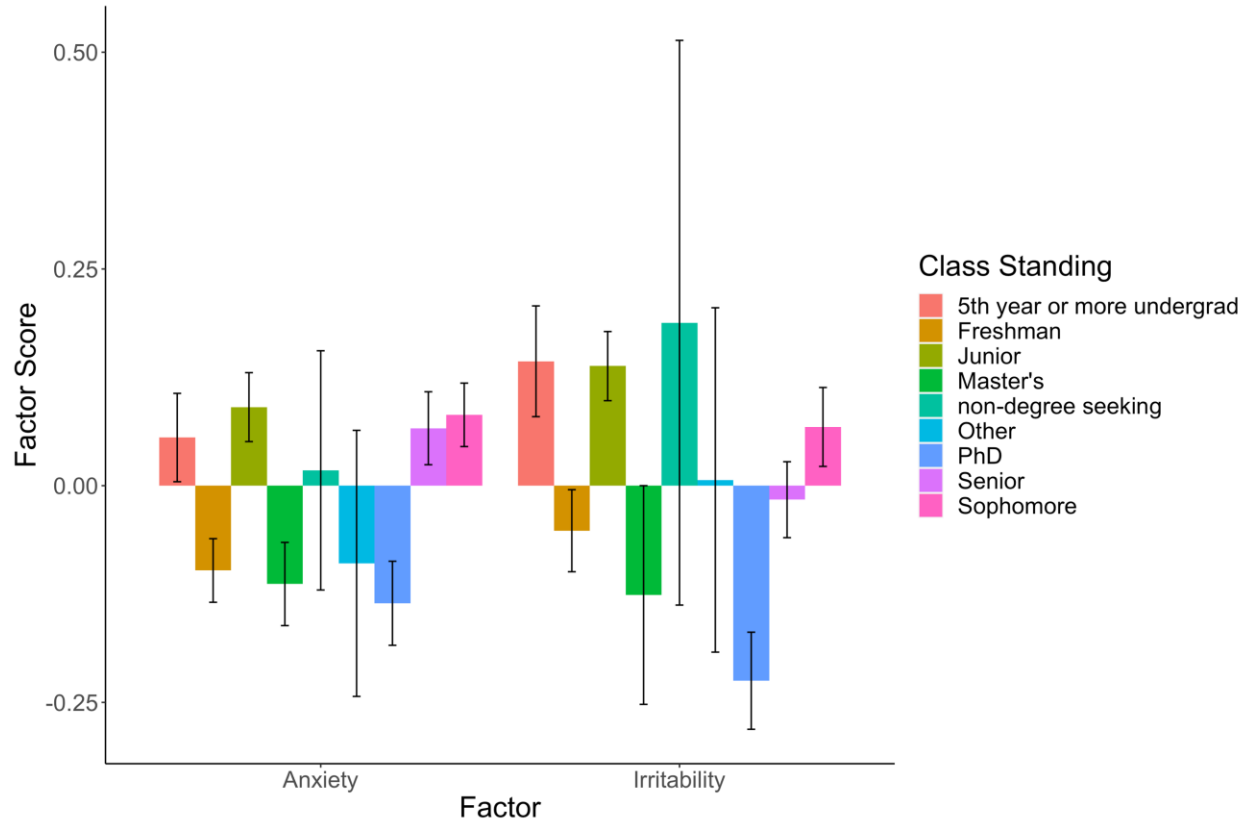

The colored bars represent the mean factor scores and the error bars are presented with all colored bars.

**Supplementary Figure 2:** Mean Factor Scores for UNLV Students (n = 1,699) by Class Standing.

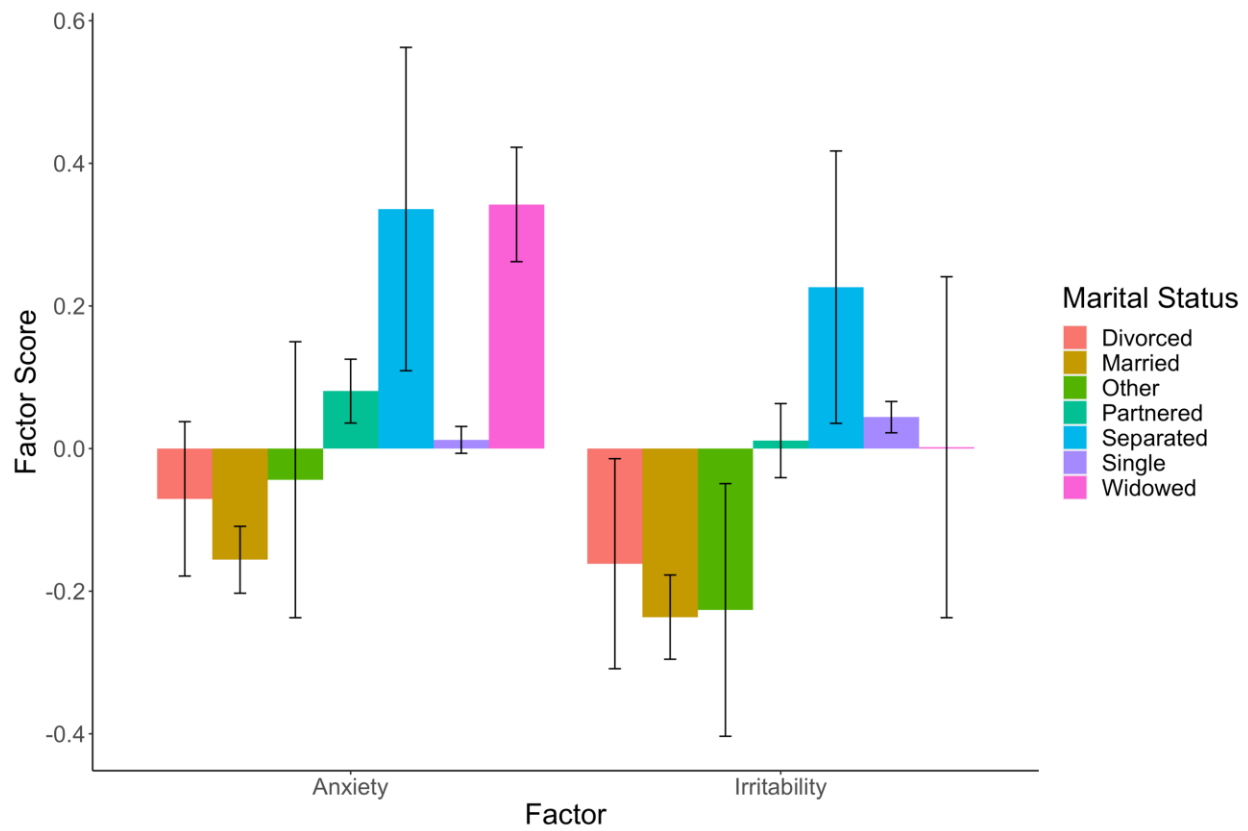

The colored bars represent the mean factor scores and the error bars are presented with all colored bars.

**Supplementary Figure 3:** Mean Factor Scores for UNLV Students (n = 1,699) by Marital Status
